# Supplementary material
Source: ML conference proceedings conference paper supplement (https://openreview.net/forum?id=AkLADaZRAZ)
Supplement: supplementary_material [file attachment]

# Semantic Codebook Learning for Dynamic Recommendation Models

Anonymous Authors

**Algorithm 1:** Semantic Codebook Learning for Dynamic Recommendation Models

**Module 1:**  $\triangleright$  *Item to Semantic*

**Target:** Item Sequence  $s_v \mapsto$  Semantic Sequence  $s_c$   
**Input:** Item Sequence  $s_v$   
**Output:** Semantic Sequence  $s_c$

**Module 2:**  $\triangleright$  *Semantic Parameter Generation*

**Target:** Semantic Sequence  $s_c \mapsto$  Semantic Parameter Generator  $\mathcal{M}_c$  and Semantic Encoder  $E_c$   
**Input:** Semantic Sequence  $s_c$   
**Output:** (Parameter  $\Theta_d$ ), Prediction  $\hat{y}$

**Module 3:**  $\triangleright$  *Semantic Metacode Learning*

**Target:** Item Sequence  $s_v$ , Semantic Sequence  $s_c \mapsto$  Item Parameter Generator  $\mathcal{M}_v$ , Item Encoder  $E_v$ , Semantic Parameter Generator  $\mathcal{M}_c$ , and Semantic Encoder  $E_c$   
**Input:** Item Sequence  $s_v$ , Semantic Sequence  $s_c$   
**Output:** (Parameter  $\Theta_d$ ), Prediction  $\hat{y}$

**Module 4:**  $\triangleright$  *Semantic Codebook Learning*

**Target:** Item Sequence  $s_v$ , Semantic Sequence  $s_c$ , Semantic Encoder  $E_c \mapsto$  Codebook  $D$   
**Input:** Item Sequence  $s_v$ , Semantic Sequence  $s_c$ , (Semantic Encoder  $E_c$ )  
**Output:** (Parameter  $\Theta_d$ ), Prediction  $\hat{y}$

**Overview:**  $\triangleright$  *Training Procedure*

**Input:** Item Sequence  $s_v$ , Semantic Sequence  $s_c$ .

**Output:** (Parameters  $\Theta_d$ ), Prediction  $\hat{y}$ .

**Initialization:** Randomly initialize the models  $\mathcal{M}$ ,  $\mathcal{M}_c$ ,  $\mathcal{M}_v$  with parameters  $\Theta_s$ ,  $\Theta_c$ ,  $\Theta_v$  respectively.

Item Sequence  $s_v \mapsto$  Semantic Sequence  $s_c$

**repeat**

**if** *Semantic Parameter Generator  $\mathcal{M}_c$  and Semantic Encoder  $E_c$  have not yet been well-trained* **then**  
        Train as follows (see Eq.12 for the details),  
         $\min_{\Theta_s, \Theta_c, \Theta_v} \mathcal{L} = \sum_{u, v, s_c, y \in \mathcal{D}} l_{CE}(y, \hat{y})$

**end**

**until** *Convergence*;

**Initialization:** Initialize the Codebook  $D$  via pretrained Semantic Encoder  $E_c$

**repeat**

**if** *Semantic Parameter Generator  $\mathcal{M}_c$  and Semantic Encoder  $E_c$  have not yet been well-trained* **then**  
        Train as follows (see Eq.13 for the details),  
         $\min_{\Theta_s, \Theta_c, \Theta_v} \mathcal{L} = \sum_{u, v, s_c, y \in \mathcal{D}} l_{CE}(y, \hat{y}) + \lambda l_{MSE}(\mathbf{E}_v, \mathbf{E}'_v)$

**end**

**until** *Convergence*;

**return**  $\mathcal{M}_c$ ,  $\mathcal{M}_v$ ,  $D$ .

**Table 1:** Statistics of Datasets.

| Dataset     | #User     | #Item   | #Interaction | Density   |
|-------------|-----------|---------|--------------|-----------|
| Arts        | 45,486    | 21,019  | 395,150      | 0.0004133 |
| Office      | 87,436    | 25,986  | 684,837      | 0.0003014 |
| Instruments | 24,962    | 9,964   | 208,926      | 0.0008400 |
| Scientific  | 8,442     | 4,385   | 59,427       | 0.0016053 |
| CDs         | 1,578,597 | 486,360 | 3,749,004    | 0.0000049 |
| Electronic  | 4,201,696 | 476,002 | 7,824,482    | 0.0000039 |
| Book        | 46,549    | 212,996 | 1,861,533    | 0.0001878 |
| Music       | 39,743    | 164,224 | 1,792,502    | 0.0002746 |

**Table 2:** Hyperparameters and training schedules of SOLID.

| Dataset                                                                           | Parameters                            | Setting    |
|-----------------------------------------------------------------------------------|---------------------------------------|------------|
| Arts<br>Office<br>Instruments<br>Scientific<br>CDs<br>Electronic<br>Book<br>Music | GPU                                   | Tesla A100 |
|                                                                                   | Optimizer                             | Adam       |
|                                                                                   | Learning Rate                         | 0.001      |
|                                                                                   | Batch Size                            | 1024       |
|                                                                                   | Sequence Length                       | 10         |
|                                                                                   | the Dimension of Embedding            | 1×32       |
|                                                                                   | the Amount of MLP                     | 2          |
|                                                                                   | Hidden Dimension of Semantic Codebook | 64         |
|                                                                                   | z Dimension of Semantic Codebook      | 32         |

## A APPENDIX

This is the Appendix for “Semantic Codebook Learning for Dynamic Recommendation Models”.

### A.1 Supplementary Methodology

*A.1.1 Pseudo Code of SOLID.* Algorithm 1 shows the pseudo code of SOLID. ( $x$ ) represents that  $x$  is a intermediate variable.

### A.2 Supplementary Experiments

*A.2.1 Datasets.* The statistics of the datasets used in the experiments is shown in Table 1.

*A.2.2 Hyperparameters and Training Schedules.* We summarize the hyperparameters and training schedules of the datasets used in the experiments in Table 2.
